# Supplementary material
Source: HighWire-hosted journal article supplement (https://erj.ersjournals.com/content/60/3/2003697)

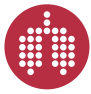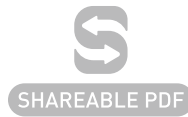

# The methyl-CpG-binding domain 2 facilitates pulmonary fibrosis by orchestrating fibroblast to myofibroblast differentiation

Yi Wang<sup>1,5</sup>, Lei Zhang<sup>1,5</sup>, Teng Huang<sup>1</sup>, Guo-Rao Wu<sup>1</sup>, Qing Zhou <sup>1</sup>, Fa-Xi Wang<sup>1</sup>, Long-Min Chen<sup>1</sup>, Fei Sun<sup>1</sup>, Yongman Lv<sup>2</sup>, Fei Xiong<sup>1</sup>, Shu Zhang<sup>1</sup>, Qilin Yu<sup>1</sup>, Ping Yang<sup>1</sup>, Weikuan Gu<sup>3</sup>, Yongjian Xu<sup>1</sup>, Jianping Zhao<sup>1,6</sup>, Huilan Zhang<sup>1,6</sup>, Weining Xiong<sup>1,4,6</sup> and Cong-Yi Wang<sup>1,6</sup>

<sup>1</sup>The Center for Biomedical Research, Dept of Respiratory and Critical Care Medicine, National Health Commission (NHC) Key Laboratory of Respiratory Diseases, Tongji Hospital, Tongji Medical College, Huazhong University of Science and Technology, Wuhan, China. <sup>2</sup>Health Management Center, Tongji Hospital, Tongji Medical College, Huazhong University of Science and Technology, Wuhan, China. <sup>3</sup>Dept of Orthopedic Surgery and BME-Campbell Clinic, University of Tennessee Health Science Center, Memphis, TN, USA. <sup>4</sup>Dept of Respiratory and Critical Care Medicine, Shanghai Key Laboratory of Tissue Engineering, Shanghai Ninth People's Hospital, Shanghai Jiaotong University School of Medicine, Shanghai, China. <sup>5</sup>These authors contributed equally to this work. <sup>6</sup>Jianping Zhao, Huilan Zhang, Weining Xiong and Cong-Yi Wang contributed equally to this article as lead authors and supervised the work.

Corresponding author: Cong-Yi Wang (wangcy@tjh.tjmu.edu.cn)

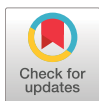

Shareable abstract (@ERSpublications)

**MBD2 is upregulated in the myofibroblasts from IPF patients and facilitates the transition of myofibroblast from fibroblast via TβRI/Smad3/Mbd2/Erdr1 positive feedback regulatory loop**  
<https://bit.ly/3q0PhHA>

**Cite this article as:** Wang Y, Zhang L, Huang T, *et al.* The methyl-CpG-binding domain 2 facilitates pulmonary fibrosis by orchestrating fibroblast to myofibroblast differentiation. *Eur Respir J* 2022; 60: 2003697 [DOI: 10.1183/13993003.03697-2020].

This single-page version can be shared freely online.

Copyright ©The authors 2022.

This version is distributed under the terms of the Creative Commons Attribution Non-Commercial Licence 4.0. For commercial reproduction rights and permissions contact [permissions@ersnet.org](mailto:permissions@ersnet.org)

This article has an editorial commentary:  
<https://doi.org/10.1183/13993003.01536-2022>

Received: 1 Oct 2020  
Accepted: 9 Dec 2021

## Abstract

Although DNA methylation has been recognised in the pathogenesis of idiopathic pulmonary fibrosis (IPF), the exact mechanisms are yet to be fully addressed. Herein, we demonstrate that lungs originated from IPF patients and mice after bleomycin (BLM)-induced pulmonary fibrosis are characterised by altered DNA methylation along with overexpression in myofibroblasts of methyl-CpG-binding domain 2 (MBD2), a reader responsible for interpreting DNA methylome-encoded information. Specifically, depletion of *Mbd2* in fibroblasts or myofibroblasts protected mice from BLM-induced pulmonary fibrosis coupled with a significant reduction of fibroblast differentiation. Mechanistically, transforming growth factor (TGF)-β1 induced a positive feedback regulatory loop between TGF-β receptor I (TβRI), Smad3 and Mbd2, and erythroid differentiation regulator 1 (Erdr1). TGF-β1 induced fibroblasts to undergo a global DNA hypermethylation along with Mbd2 overexpression in a TβRI/Smad3 dependent manner, and Mbd2 selectively bound to the methylated CpG DNA within the *Erdr1* promoter to repress its expression, through which it enhanced TGF-β/Smad signalling to promote differentiation of fibroblast into myofibroblast and exacerbate pulmonary fibrosis. Therefore, enhancing Erdr1 expression strikingly reversed established pulmonary fibrosis. Collectively, our data support that strategies aimed at silencing Mbd2 or increasing Erdr1 could be viable therapeutic approaches for prevention and treatment of pulmonary fibrosis in clinical settings.

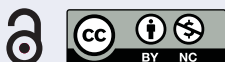

Supplement: inline-supplementary-material-13 [file inline-supplementary-material-13.pdf]
